# Supplementary material for: Observed amplification of the seasonal CO2 cycle at the Southern Ocean Time Series
Source: Frontiers journal article supplement (doi:10.3389/fmars.2023.1281854), 2023-10-13
Supplement: Data_Sheet_1.pdf [file Data_Sheet_1.pdf]

# ***Observed amplification of the seasonal CO<sub>2</sub> cycle at the Southern Ocean Time Series: Supplementary Material***

## **1 SUPPLEMENTARY FIGURES**

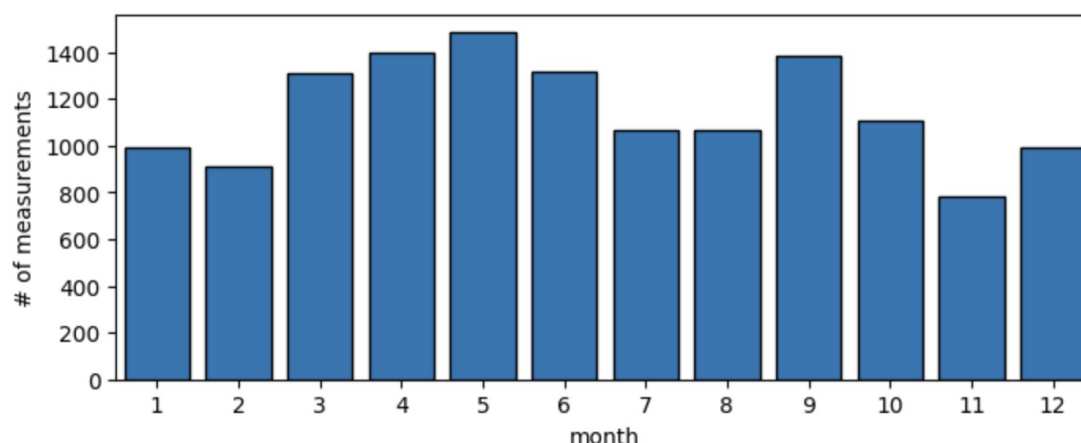

**Figure S1.** The distribution of pCO<sub>2</sub> observations at the SOTS site by month for all deployments between 2011 and 2021.

**Table S1.** Trends in winter (August) and summer (December) net primary production (NPP, mg C m<sup>-2</sup> yr<sup>-1</sup>) and mixed layer depth (MLD, m yr<sup>-1</sup>) from the CAFE60 reanalysis product based on the period between 2001 and 2020; there are modest decreases (increases) in winter NPP (MLD), and modest increases (decreases) in summer NPP (MLD). These changes may indicate an increased delivery of carbon-rich subsurface water to the upper ocean in the winter, leading to increased winter pCO<sub>2</sub>, and a shallower summer mixed layer, leading to increased NPP, and depleted summer pCO<sub>2</sub>.

| season   | NPP   | MLD  |
|----------|-------|------|
| August   | -2.42 | 15.7 |
| December | 5.54  | -0.2 |

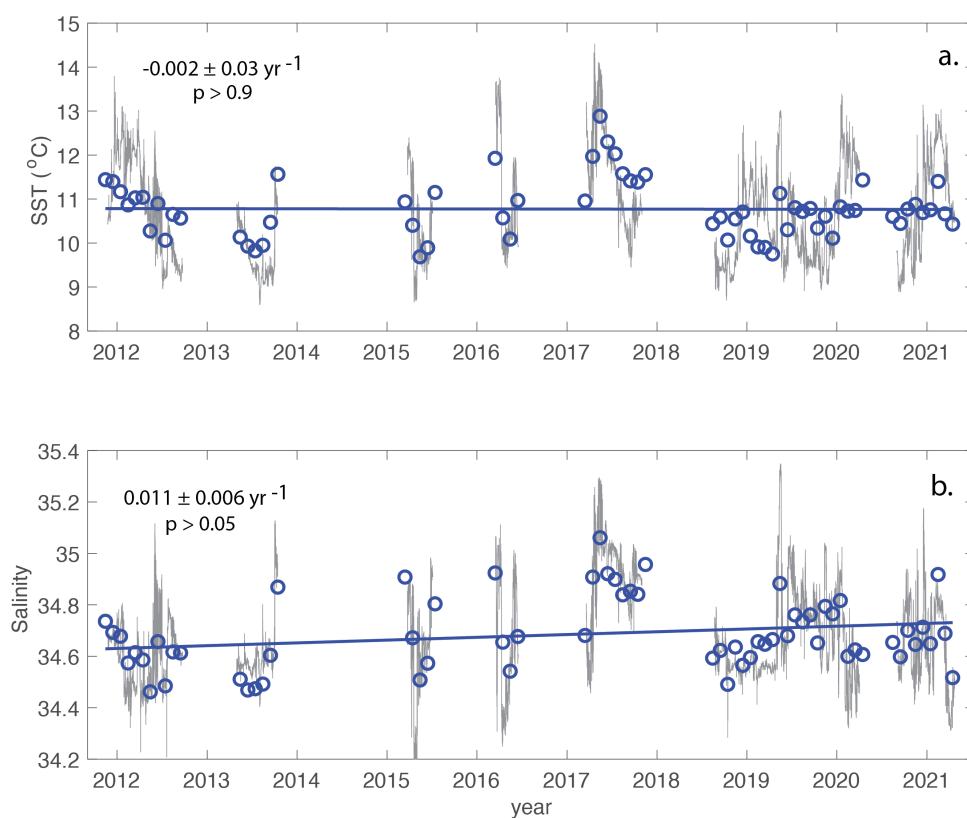

**Figure S2.** Time series of hourly (grey) sea surface temperature (a, SST) and salinity (b) between 2011 and 2021 at the SOTS site. Also shown are the deseasoned monthly values (blue circles) and the trend lines associated with these data computed as described in the Methods section in the main text.

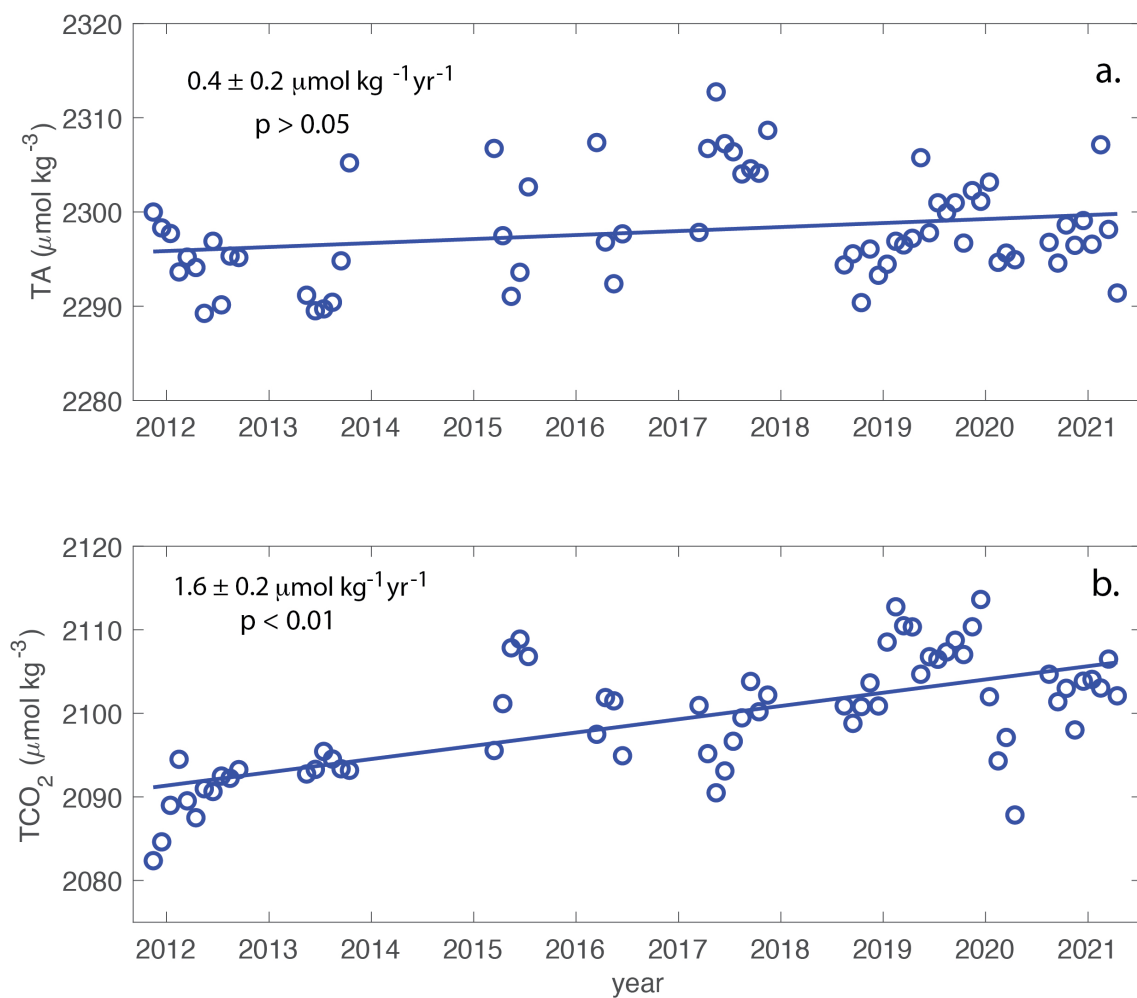

**Figure S3.** Deseasoned observations at SOTS: a) TA computed as function of salinity and b)  $\text{TCO}_2$  computed with  $\text{pCO}_2$  and TA. Trend lines in both panels are computed as described in the Methods section in the main text; there is no statistically significant trend in TA.

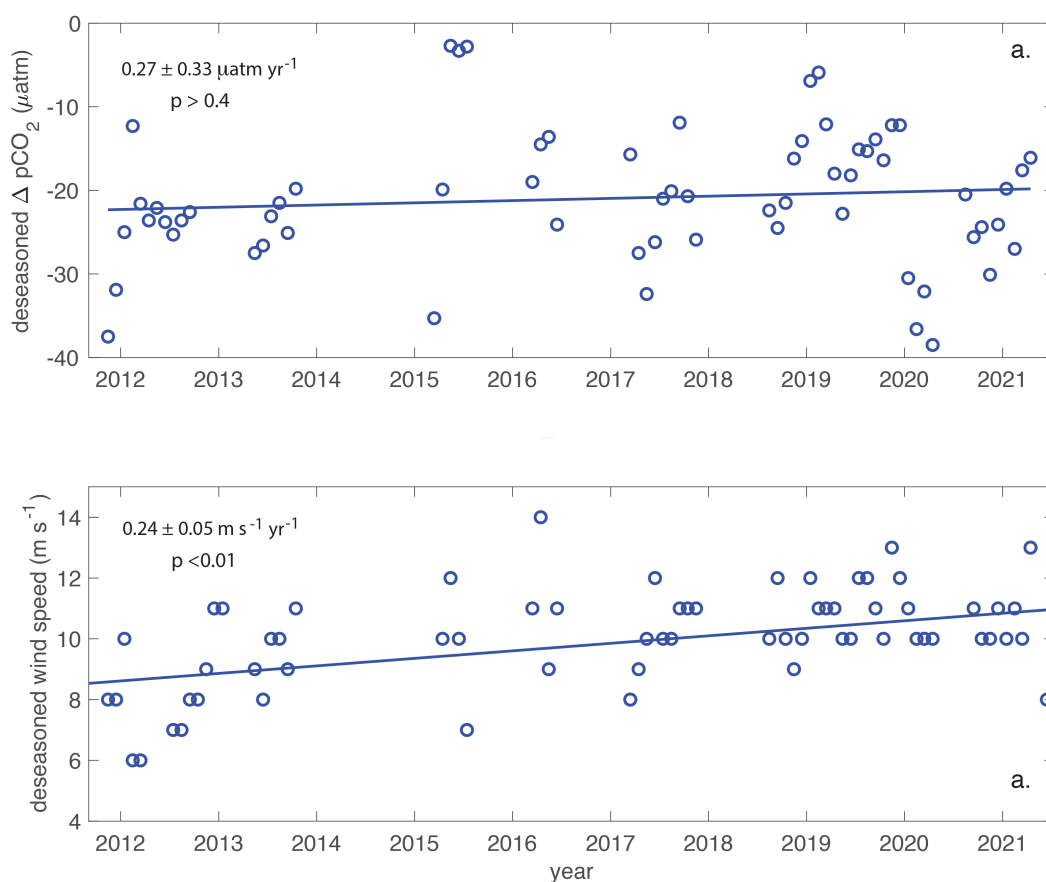

**Figure S4.** Deseasoned observations at SOTS: a)  $\Delta p\text{CO}_2$  and b) wind speed. Trend lines in both panels are computed as described in the Methods section in the main text; note that for both parameters, the  $r^2$  associated with the trends is quite low ( $r^2=0.12$  for  $\Delta p\text{CO}_2$ , and  $r^2=0.23$  for wind speed).
